# Supplementary material for: Effects of the Crystalline Properties of Hollow Ceria Nanostructures on a CuO-CeO2 Catalyst in CO Oxidation
Source: MDPI journal article supplement (doi:10.3390/ma15113859), 2022-05-28
Supplement: s1 [file s1]

## Supporting Information

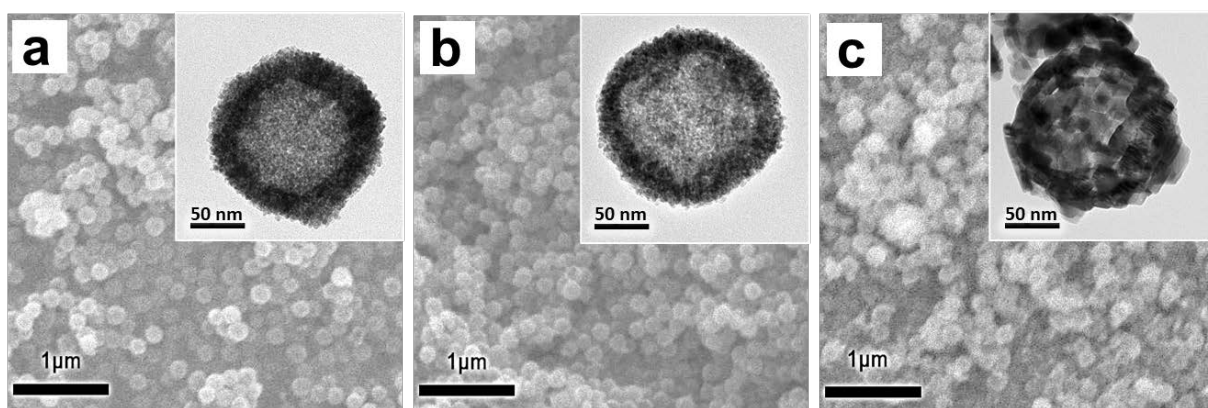

Figure S1. SEM images of H-Cu-CeO<sub>2</sub> catalysts: (a) H-Cu-CeO<sub>2</sub> (HT), (b) H-Cu-CeO<sub>2</sub> (500) and (c) H-Cu-CeO<sub>2</sub> (800)

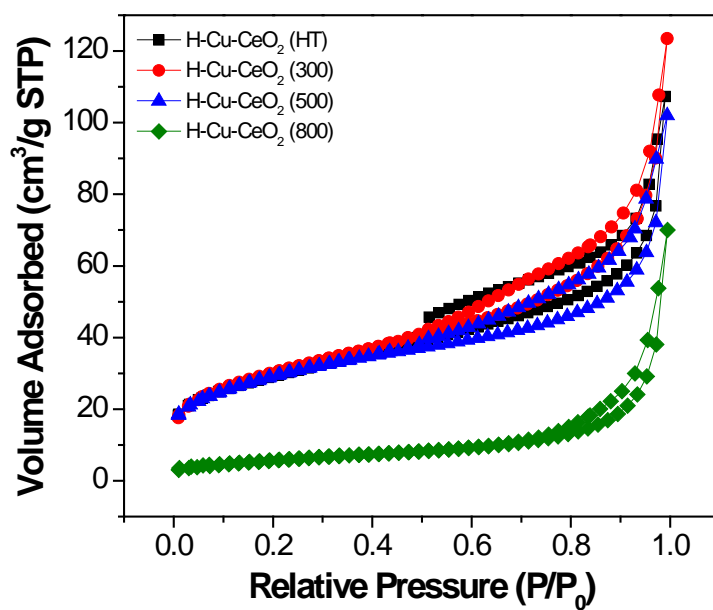

Figure S2. N<sub>2</sub> adsorption-desorption isotherms of H-Cu-CeO<sub>2</sub> catalysts

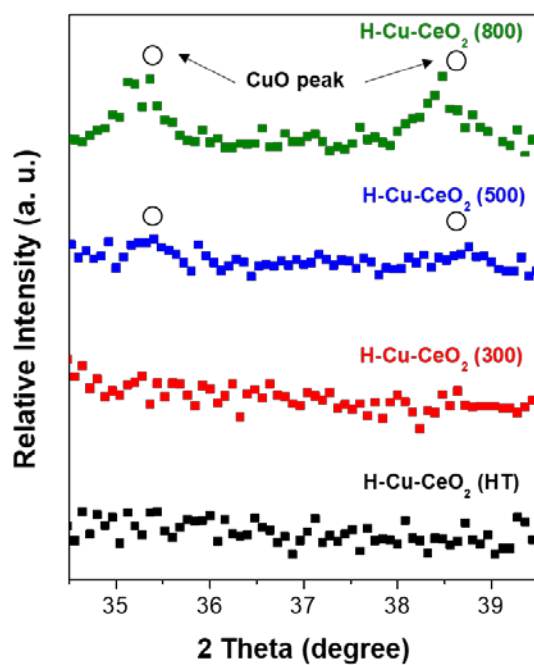

Figure S3. The XRD patterns of H-Cu-CeO<sub>2</sub> catalysts in the 2 theta range of 34.5 to 39.5°

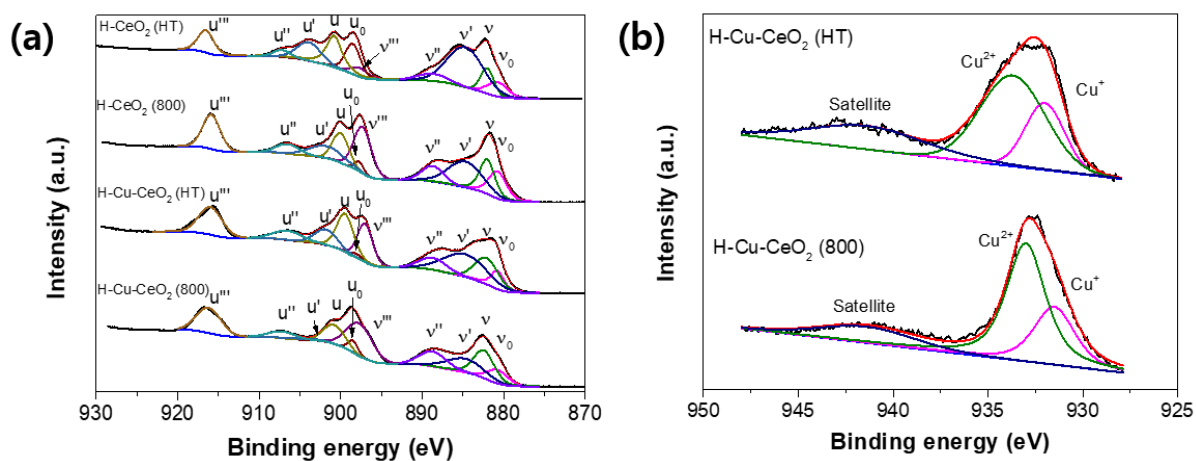

Figure S4. XPS results of H-CeO<sub>2</sub> (x) supports and H-Cu-CeO<sub>2</sub> (x) catalysts: (a) Ce 3d and (b) Cu 2p spectra

Table S1. Relative mass ratio and estimated CuO loading values of H-Cu-CeO<sub>2</sub> catalysts

| Sample                         | Mass ratio |        |        | Cu/(Cu+Ce) | Estimated<br>CuO/(CuO+CeO <sub>2</sub> ) |
|--------------------------------|------------|--------|--------|------------|------------------------------------------|
|                                | Cu         | Ce     | others |            |                                          |
| H-Cu-CeO <sub>2</sub><br>(HT)  | 0.1079     | 0.8724 | 0.0197 | 0.1101     | 0.1114                                   |
| H-Cu-CeO <sub>2</sub><br>(500) | 0.1135     | 0.8675 | 0.0190 | 0.1157     | 0.1176                                   |
| H-Cu-CeO <sub>2</sub><br>(800) | 0.1037     | 0.8754 | 0.0209 | 0.1059     | 0.1078                                   |
